# Supplementary material
Source: PubMed Central journal article supplement (PMC2793671)
Supplement: NIHMS161374-supplement-Supp1PDF.pdf [file NIHMS161374-supplement-Supp1PDF.pdf]

# 6-Azahemiporphycene: A New Member of the Porphyrinoid Family

*Federica Mandoj,<sup>1</sup> Sara Nardis,<sup>1</sup> Giuseppe Pomarico,<sup>1</sup> Manuela Stefanelli,<sup>1</sup> Luca Schiaffino,<sup>1</sup>  
Gianfranco Ercolani,<sup>1</sup> Luca Prodi,<sup>2\*</sup> Damiano Genovese,<sup>2</sup> Nelsi Zaccheroni,<sup>2</sup> Frank R. Fronczek,<sup>3</sup>  
Kevin M. Smith,<sup>3\*</sup> Xiao Xiao,<sup>4</sup> Jing Shen,<sup>4</sup> Karl M. Kadish<sup>4\*</sup> and Roberto Paolesse<sup>1\*</sup>*

**SUPPORTING INFORMATION**

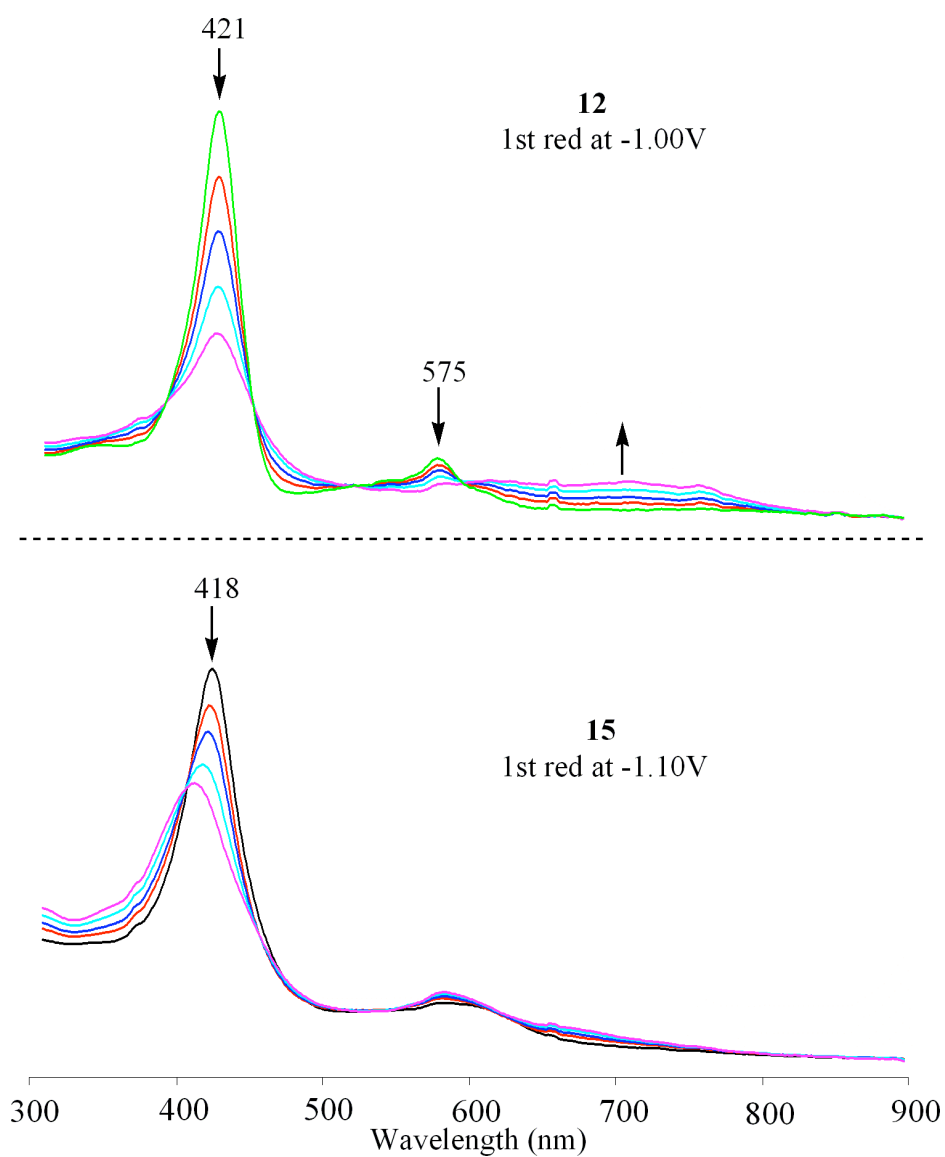

**Figure S1.** UV-visible spectral changes during the first reduction of free-base and  $\text{Co}^{\text{II}}$  azahemiporphycenes in PhCN, 0.1 M TBAP.

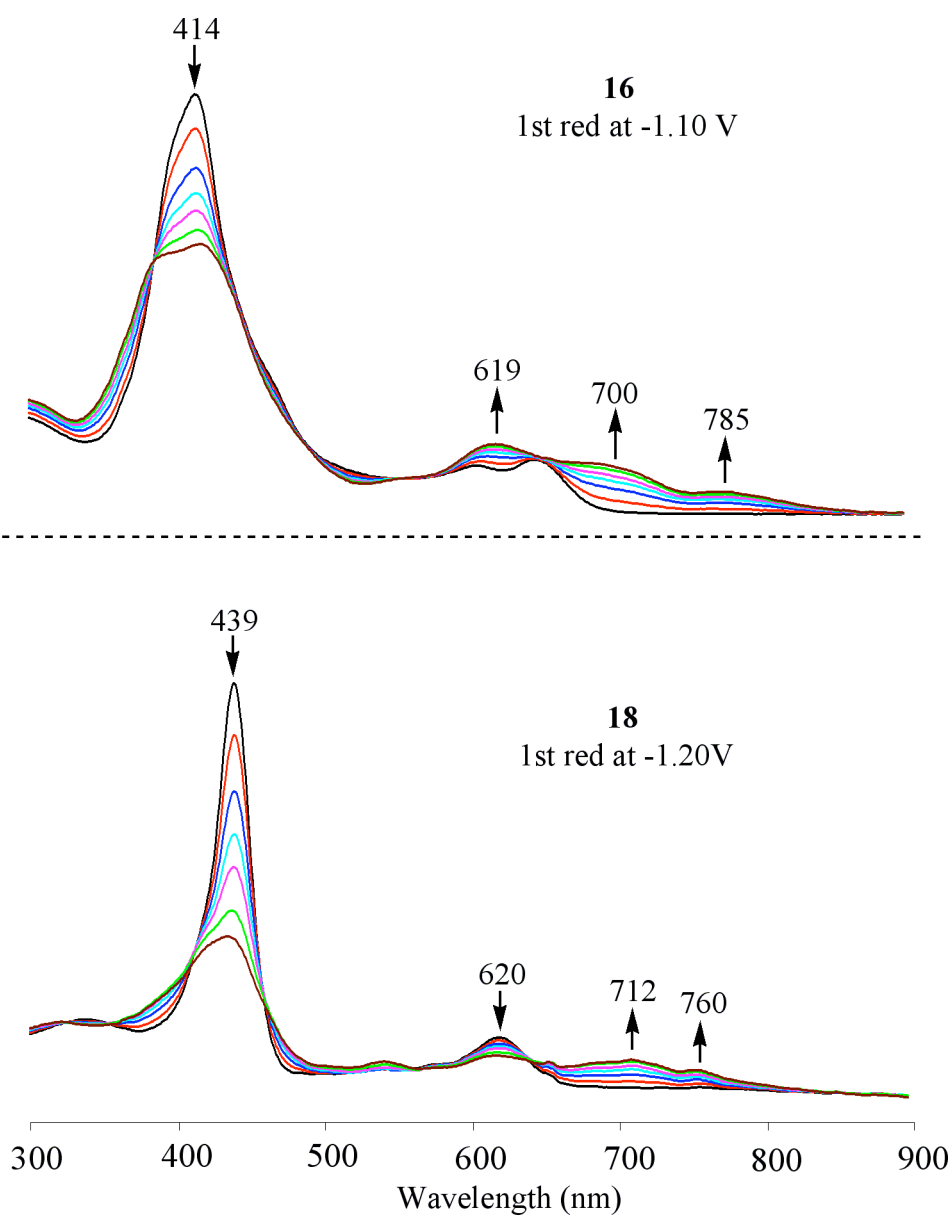

**Figure S2.** UV-visible spectral changes during the first reduction of the Ni<sup>II</sup> and Zn<sup>II</sup> azahemiporphycenes in PhCN, 0.1 M TBAP.

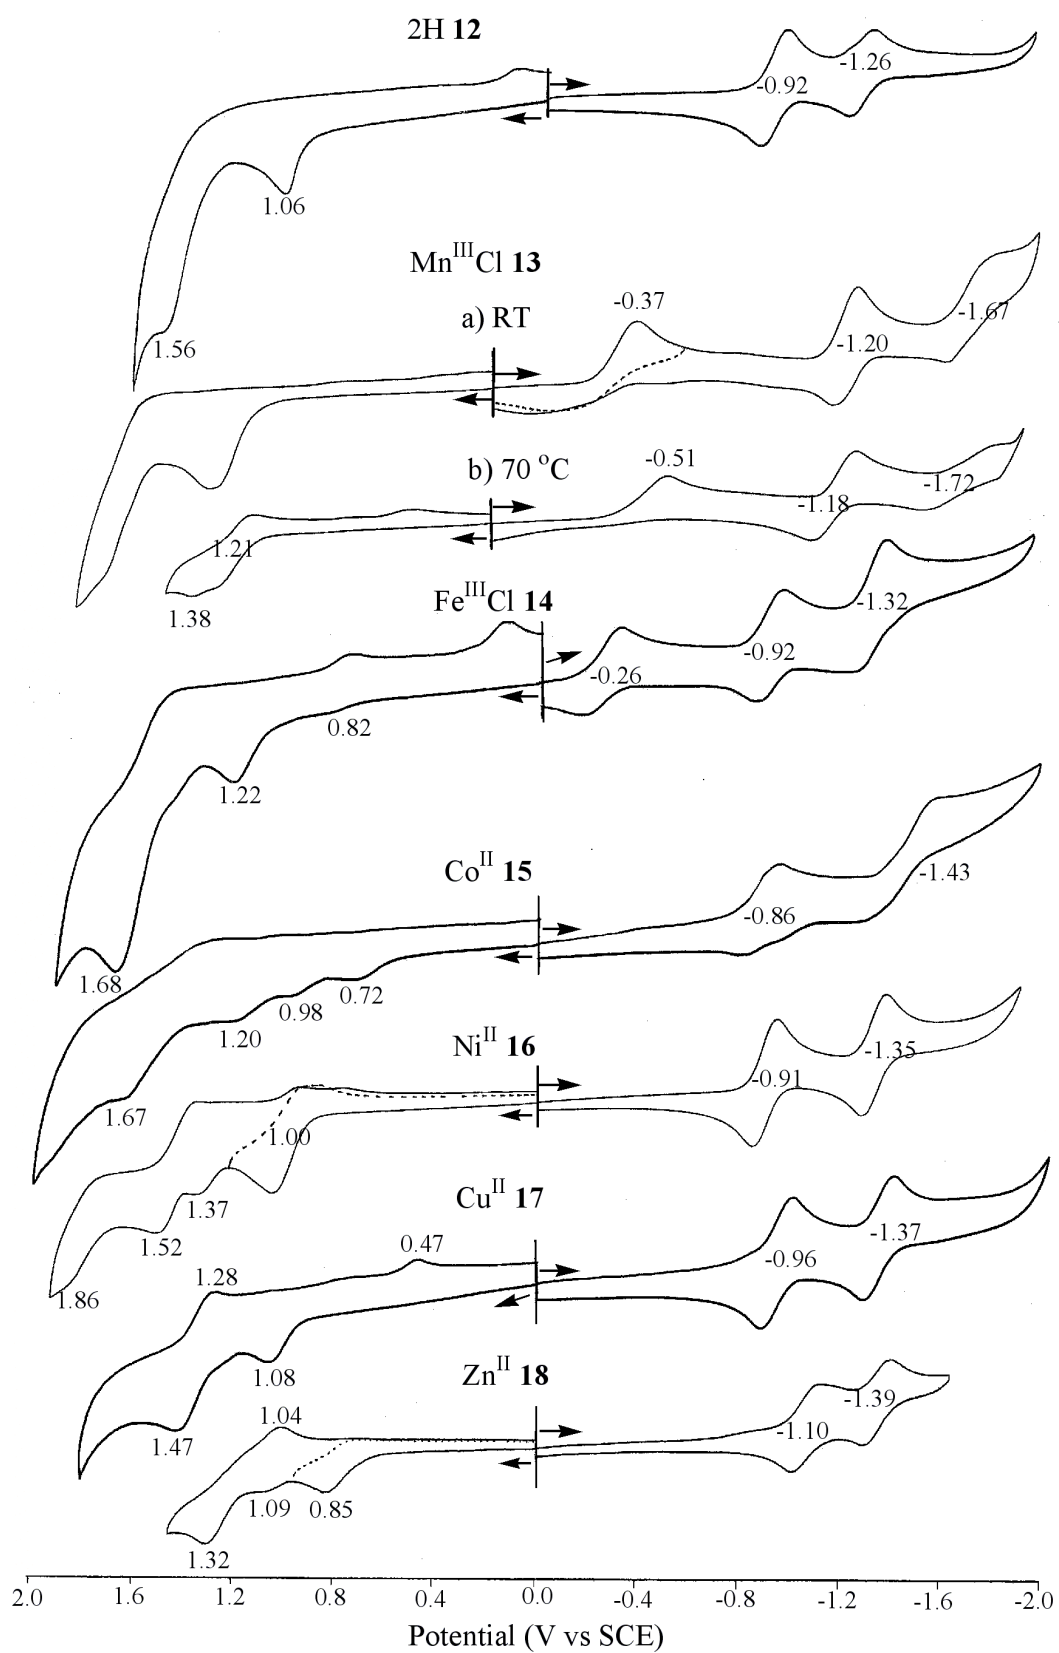

**Figure S3.** Cyclic voltammograms of M-6-aza-5,11,16-tris-(4-tert-butylphenyl) hemiporphycene in CH<sub>2</sub>Cl<sub>2</sub> containing 0.1 M TBAP. M is indicated in the figure.

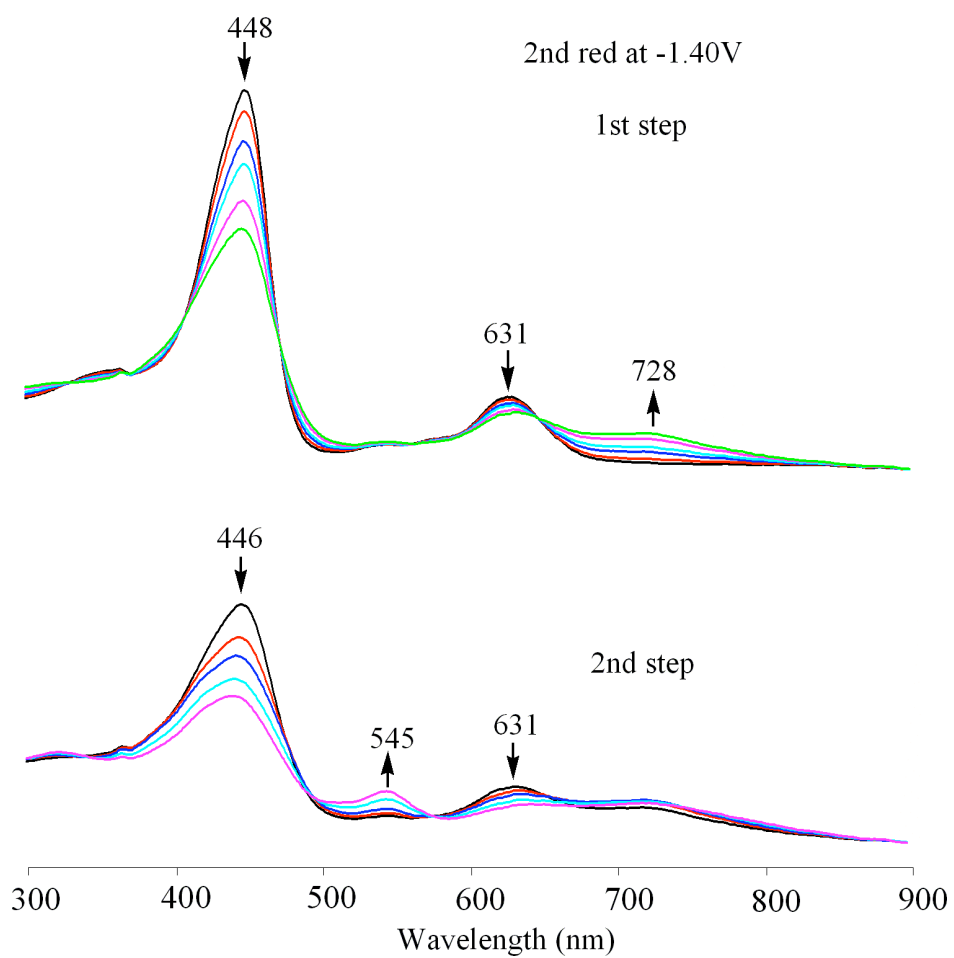

**Figure S4.** UV-visible spectral changes during the second reduction of the Mn<sup>III</sup>Cl azahemiporphycene **13** in PhCN, 0.1 M TBAP.

## Computational results

**6-Azahemiporphycene AC** optimized at the B3LYP/6-311+G(d) level

EE (hartrees) = -1005.8020657

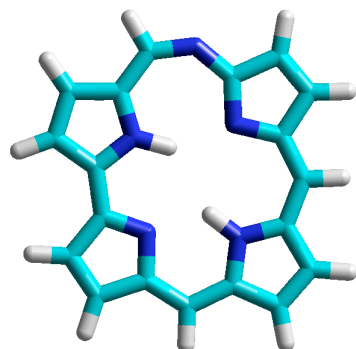

37

|   |          |           |           |
|---|----------|-----------|-----------|
| C | 4.936171 | -2.968358 | 1.244869  |
| C | 4.610979 | -2.055379 | 0.193472  |
| N | 5.766801 | -1.813270 | -0.477271 |
| C | 6.817558 | -2.507377 | 0.066508  |
| C | 6.286491 | -3.244380 | 1.166285  |
| C | 3.356684 | -1.499316 | -0.116992 |
| C | 8.127516 | -2.432462 | -0.448382 |
| C | 8.463911 | -1.651518 | -1.549358 |
| N | 7.511597 | -0.905666 | -2.189532 |
| C | 8.107003 | -0.271521 | -3.195522 |
| C | 9.524012 | -0.595346 | -3.245613 |
| C | 9.745897 | -1.460864 | -2.212296 |
| C | 7.296674 | 0.568596  | -4.009448 |
| N | 5.966136 | 0.684115  | -3.729166 |
| C | 5.361895 | 1.526736  | -4.615619 |
| C | 6.368808 | 1.974831  | -5.513857 |
| C | 7.563219 | 1.382353  | -5.138707 |
| C | 3.991226 | 1.877784  | -4.627352 |
| N | 2.962059 | 1.552746  | -3.884967 |
| C | 2.818159 | 0.745392  | -2.809001 |
| N | 3.699721 | -0.016641 | -2.113769 |
| C | 2.955855 | -0.617615 | -1.113340 |
| C | 1.556323 | -0.204560 | -1.200230 |
| C | 1.471066 | 0.638481  | -2.249085 |
| H | 8.895506 | -3.017437 | 0.046015  |
| H | 3.743467 | 2.570553  | -5.433952 |
| H | 5.450149 | 0.222586  | -2.973189 |
| H | 5.914052 | -1.211137 | -1.286984 |
| H | 8.528892 | 1.504949  | -5.606919 |
| H | 6.206086 | 2.656671  | -6.336206 |
| H | 0.613535 | 1.161000  | -2.646855 |
| H | 0.771283 | -0.534621 | -0.532834 |
| H | 4.229355 | -3.360012 | 1.962350  |

|   |           |           |           |
|---|-----------|-----------|-----------|
| H | 6.858461  | -3.897620 | 1.809677  |
| H | 10.683806 | -1.921543 | -1.932139 |
| H | 10.246655 | -0.223547 | -3.958814 |
| H | 2.557886  | -1.821726 | 0.544556  |

**Porphyrin** optimized at the B3LYP/6-311+G(d) level  
EE (hartrees) = -989.771521

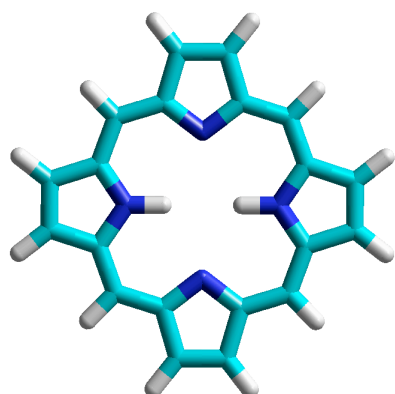

38

|   |           |           |           |
|---|-----------|-----------|-----------|
| N | 2.169081  | -2.687098 | 1.769407  |
| C | 1.319849  | -3.205879 | 2.698538  |
| C | 2.026989  | -4.103647 | 3.605572  |
| C | 3.319836  | -4.111227 | 3.199694  |
| C | 3.391203  | -3.218532 | 2.047868  |
| C | -0.048085 | -2.930706 | 2.792014  |
| C | -0.794919 | -2.090079 | 1.970861  |
| C | -2.195980 | -1.797691 | 2.053586  |
| C | -2.507334 | -0.921634 | 1.046507  |
| C | -1.308049 | -0.646001 | 0.310881  |
| N | -0.309515 | -1.372904 | 0.907290  |
| C | -1.156029 | 0.188234  | -0.793512 |
| C | 0.022581  | 0.447363  | -1.500246 |
| C | 0.094022  | 1.340236  | -2.651929 |
| C | 1.387032  | 1.333217  | -3.057298 |
| C | 2.094079  | 0.435173  | -2.150461 |
| N | 1.244882  | -0.083541 | -1.221333 |
| C | 3.462208  | 0.160589  | -2.243481 |
| C | 4.209068  | -0.679795 | -1.422190 |
| C | 5.610185  | -0.972088 | -1.504806 |
| C | 5.921582  | -1.847920 | -0.497600 |
| C | 4.722236  | -2.123779 | 0.237893  |
| N | 3.723582  | -1.397193 | -0.358769 |
| C | 4.569944  | -2.959048 | 1.341401  |
| H | 2.757611  | -1.391150 | -0.054799 |
| H | 0.656347  | -1.379391 | 0.602974  |
| H | 5.469413  | -3.459830 | 1.684370  |
| H | 6.888662  | -2.273751 | -0.271065 |
| H | 6.278193  | -0.556326 | -2.245630 |
| H | 1.832694  | 1.872765  | -3.882550 |
| H | -0.737424 | 1.887727  | -3.075902 |
| H | -2.055647 | 0.688587  | -1.136716 |
| H | -3.474314 | -0.495453 | 0.820212  |
| H | -2.863942 | -2.213378 | 2.794491  |
| H | -0.595409 | -3.422504 | 3.589531  |



|   |          |           |           |
|---|----------|-----------|-----------|
| H | 1.581358 | -4.643219 | 4.430840  |
| H | 4.151361 | -4.658444 | 3.623833  |
| H | 4.009292 | 0.651798  | -3.041525 |

Corrole optimized at the B3LYP/6-311+G(d) level  
EE (hartrees) = -951.6431401

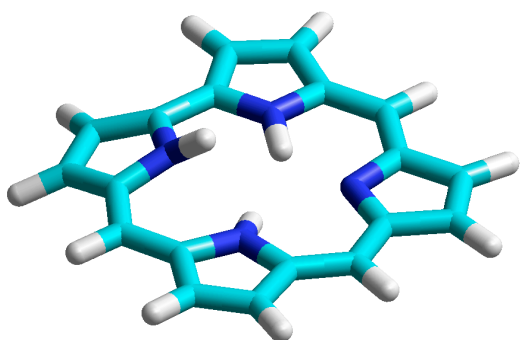

37

|   |           |           |           |
|---|-----------|-----------|-----------|
| N | 2.326160  | -2.379036 | 2.084855  |
| C | 1.404993  | -3.202959 | 2.711104  |
| C | 2.136951  | -4.303270 | 3.194397  |
| C | 3.478982  | -4.129174 | 2.834813  |
| C | 3.599537  | -2.920035 | 2.110681  |
| C | 0.041339  | -2.870710 | 2.481408  |
| C | -1.240700 | -3.267759 | 2.944908  |
| C | -2.196077 | -2.547787 | 2.229938  |
| C | -1.514218 | -1.700874 | 1.309134  |
| N | -0.183734 | -1.920233 | 1.526741  |
| C | -1.887556 | -0.821408 | 0.274066  |
| C | -0.971270 | -0.167411 | -0.562027 |
| C | -1.307767 | 0.783746  | -1.605773 |
| C | -0.133050 | 1.209538  | -2.145636 |
| C | 0.932027  | 0.514925  | -1.438585 |
| N | 0.401412  | -0.311676 | -0.499902 |
| C | 2.310137  | 0.701868  | -1.686150 |
| C | 3.373543  | 0.084510  | -1.034786 |
| N | 3.227266  | -0.874825 | -0.053516 |
| C | 4.457666  | -1.336197 | 0.405347  |
| C | 5.435578  | -0.578121 | -0.322130 |
| C | 4.787676  | 0.273481  | -1.183021 |
| C | 4.644482  | -2.316714 | 1.378211  |
| H | 2.183591  | -1.382926 | 2.006612  |
| H | 5.658136  | -2.658805 | 1.551519  |
| H | 4.278500  | -4.837638 | 2.998568  |
| H | 1.714128  | -5.173481 | 3.675344  |
| H | -1.430436 | -3.988470 | 3.726961  |
| H | -3.268546 | -2.620467 | 2.341718  |
| H | -2.943866 | -0.642887 | 0.106309  |
| H | -2.309846 | 1.090274  | -1.875910 |
| H | 0.006865  | 1.926128  | -2.944329 |
| H | 2.572869  | 1.417609  | -2.458067 |
| H | 5.243103  | 0.987052  | -1.855185 |
| H | 6.503112  | -0.664262 | -0.175128 |

|   |          |           |          |
|---|----------|-----------|----------|
| H | 2.348767 | -1.360251 | 0.035732 |
| H | 0.472568 | -1.489822 | 0.872580 |

**Hemiporphycene** optimized at the B3LYP/6-311+G(d) level  
EE (hartrees) = -989.7622354

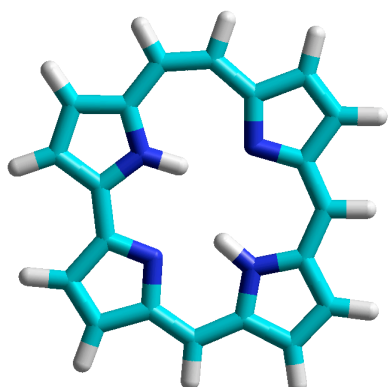

38

|   |           |           |           |
|---|-----------|-----------|-----------|
| C | 0.026937  | 0.010829  | -0.063884 |
| C | -0.002084 | 0.001762  | 1.395002  |
| N | 1.253933  | -0.000882 | 1.905480  |
| C | 2.099374  | 0.005346  | 0.813680  |
| C | 1.330602  | 0.013202  | -0.423043 |
| C | -1.268112 | -0.002688 | 2.050133  |
| C | -1.700109 | -0.010887 | 3.360293  |
| C | -0.999598 | -0.018213 | 4.582601  |
| N | 0.358378  | -0.019014 | 4.719366  |
| C | 0.707640  | -0.026861 | 6.043676  |
| C | -0.493097 | -0.031329 | 6.795120  |
| C | -1.545984 | -0.026160 | 5.896472  |
| C | 2.076431  | -0.029104 | 6.411382  |
| N | 2.986225  | -0.023315 | 5.437741  |
| C | 4.219421  | -0.026841 | 6.028219  |
| C | 4.059734  | -0.035577 | 7.476453  |
| C | 2.716751  | -0.036939 | 7.718671  |
| C | 5.378882  | -0.022275 | 5.259280  |
| C | 5.361946  | -0.013752 | 3.850821  |
| N | 4.202506  | -0.009073 | 3.120029  |
| C | 4.458695  | -0.001058 | 1.783327  |
| C | 5.883065  | -0.000412 | 1.644375  |
| C | 6.434221  | -0.008106 | 2.908148  |
| C | 3.492981  | 0.005281  | 0.767942  |
| H | 6.345749  | -0.025328 | 5.750504  |
| H | -2.779507 | -0.011955 | 3.486634  |
| H | 1.001465  | -0.014361 | 3.922559  |
| H | 3.296690  | -0.011729 | 3.588691  |
| H | -0.554069 | -0.037702 | 7.873554  |
| H | -2.602098 | -0.027621 | 6.125477  |
| H | -0.844320 | 0.014688  | -0.705095 |
| H | 1.752476  | 0.019363  | -1.419353 |
| H | 6.409823  | 0.005224  | 0.700727  |
| H | 7.484111  | -0.009784 | 3.164311  |
| H | 4.858964  | -0.039982 | 8.205716  |

|   |           |           |           |
|---|-----------|-----------|-----------|
| H | 2.220888  | -0.042644 | 8.679605  |
| H | 3.909281  | 0.011266  | -0.235176 |
| H | -2.085194 | 0.001454  | 1.333205  |

**6-Azahemiporphycene AB** optimized at the B3LYP/6-311++G(d,p) level  
EE (hartrees) = -1005.79603437

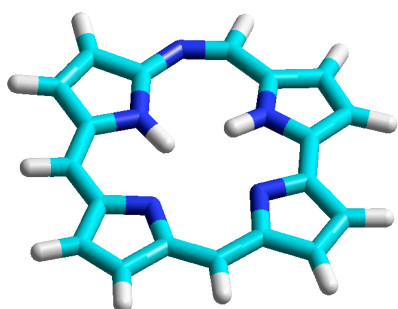

37

|   |           |           |           |
|---|-----------|-----------|-----------|
| C | 4.913985  | -3.084684 | 1.235508  |
| C | 4.505514  | -2.156666 | 0.189593  |
| N | 5.559352  | -1.800204 | -0.587646 |
| C | 6.637251  | -2.444496 | -0.081963 |
| C | 6.248933  | -3.270302 | 1.060079  |
| C | 3.218393  | -1.644722 | -0.005094 |
| C | 7.967486  | -2.339197 | -0.551989 |
| C | 8.413306  | -1.515198 | -1.578017 |
| N | 7.574368  | -0.669755 | -2.228087 |
| C | 8.265347  | -0.105159 | -3.216001 |
| C | 9.646573  | -0.562682 | -3.226041 |
| C | 9.742248  | -1.443966 | -2.187160 |
| C | 7.482342  | 0.738175  | -4.064184 |
| N | 6.173965  | 0.858216  | -3.694178 |
| C | 5.447962  | 1.536589  | -4.626870 |
| C | 6.375326  | 1.917479  | -5.637927 |
| C | 7.627359  | 1.423385  | -5.292158 |
| C | 4.052258  | 1.760865  | -4.630252 |
| N | 3.054614  | 1.420156  | -3.849387 |
| C | 2.825118  | 0.677047  | -2.764752 |
| N | 3.583165  | -0.201277 | -1.992466 |
| C | 2.802997  | -0.735894 | -0.978072 |
| C | 1.502582  | -0.168008 | -1.105319 |
| C | 1.517116  | 0.680863  | -2.179121 |
| H | 8.700555  | -2.973169 | -0.062365 |
| H | 3.739508  | 2.363631  | -5.484085 |
| H | 5.895967  | 0.435321  | -2.819118 |
| H | 8.541142  | 1.513217  | -5.858371 |
| H | 6.118462  | 2.474144  | -6.526583 |
| H | 0.714299  | 1.282484  | -2.574076 |
| H | 0.676324  | -0.388950 | -0.446499 |
| H | 4.271247  | -3.521476 | 1.986582  |
| H | 6.916397  | -3.887854 | 1.644770  |
| H | 10.615401 | -2.001917 | -1.879072 |
| H | 10.424723 | -0.265326 | -3.913751 |
| H | 2.446047  | -1.961895 | 0.687798  |

H 4.534511 -0.549051 -2.089577

**6-Azahemiporphycene AC** optimized at the B3LYP/6-311++G(d,p) level  
EE (hartrees) = -1005.82824421

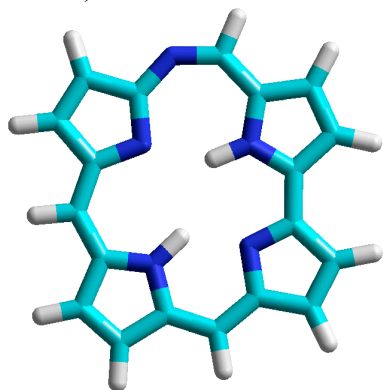

37

|   |           |           |           |
|---|-----------|-----------|-----------|
| C | 4.937840  | -2.962536 | 1.246801  |
| C | 4.617278  | -2.053062 | 0.190098  |
| N | 5.774836  | -1.814320 | -0.478039 |
| C | 6.821777  | -2.508162 | 0.071858  |
| C | 6.287973  | -3.240539 | 1.173661  |
| C | 3.363455  | -1.498954 | -0.124492 |
| C | 8.131463  | -2.434978 | -0.443917 |
| C | 8.462378  | -1.655668 | -1.547955 |
| N | 7.506544  | -0.911895 | -2.185492 |
| C | 8.098095  | -0.277347 | -3.193587 |
| C | 9.515348  | -0.599549 | -3.248566 |
| C | 9.741854  | -1.463958 | -2.215313 |
| C | 7.287606  | 0.564320  | -4.005269 |
| N | 5.957435  | 0.684202  | -3.725525 |
| C | 5.359564  | 1.531009  | -4.612231 |
| C | 6.368897  | 1.976640  | -5.509100 |
| C | 7.559922  | 1.378289  | -5.133292 |
| C | 3.990564  | 1.887579  | -4.625775 |
| N | 2.960070  | 1.560912  | -3.885400 |
| C | 2.817900  | 0.749045  | -2.812819 |
| N | 3.702957  | -0.011915 | -2.120144 |
| C | 2.961664  | -0.617891 | -1.121338 |
| C | 1.560158  | -0.210507 | -1.207395 |
| C | 1.471228  | 0.635203  | -2.253692 |
| H | 8.900835  | -3.017006 | 0.049509  |
| H | 3.748105  | 2.583690  | -5.430300 |
| H | 5.431420  | 0.225595  | -2.970001 |
| H | 5.937705  | -1.216018 | -1.292466 |
| H | 8.526221  | 1.496286  | -5.598577 |
| H | 6.208989  | 2.659810  | -6.329382 |
| H | 0.613380  | 1.155418  | -2.650743 |
| H | 0.778586  | -0.546636 | -0.540926 |
| H | 4.228268  | -3.349108 | 1.962572  |
| H | 6.857681  | -3.890585 | 1.820288  |
| H | 10.679562 | -1.923371 | -1.937048 |
| H | 10.233223 | -0.227048 | -3.964316 |



H 2.564112 -1.822065 0.534647

**6-Azahemiporphycene AD** optimized at the B3LYP/6-311++G(d,p) level  
EE (hartrees) = -1005.82135586

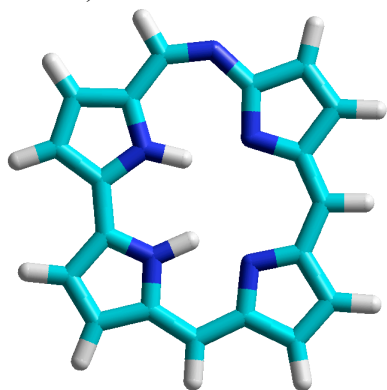

37

|   |           |           |           |
|---|-----------|-----------|-----------|
| C | 2.944573  | -3.096949 | 0.000074  |
| C | 1.638553  | -2.444681 | -0.000142 |
| N | 1.792011  | -1.115062 | -0.000130 |
| C | 3.136465  | -0.852808 | 0.000098  |
| C | 3.876652  | -2.102714 | -0.000059 |
| C | 0.396864  | -3.118591 | -0.000199 |
| C | 3.628667  | 0.458711  | 0.000202  |
| C | 2.776692  | 1.574796  | 0.000165  |
| N | 1.419600  | 1.387272  | 0.000304  |
| C | 0.757468  | 2.562486  | 0.000146  |
| C | 1.739667  | 3.596905  | 0.000070  |
| C | 2.983928  | 2.987199  | 0.000085  |
| C | -0.660776 | 2.559133  | 0.000165  |
| N | -1.365232 | 1.385716  | 0.000250  |
| C | -2.707882 | 1.649956  | 0.000110  |
| C | -2.860736 | 3.061457  | 0.000119  |
| C | -1.596069 | 3.622746  | 0.000098  |
| C | -3.749204 | 0.690443  | 0.000024  |
| N | -3.777347 | -0.619399 | -0.000096 |
| C | -2.779820 | -1.533422 | -0.000208 |
| N | -1.433183 | -1.386536 | -0.000026 |
| C | -0.918779 | -2.669915 | -0.000188 |
| C | -2.009985 | -3.646641 | -0.000070 |
| C | -3.161029 | -2.943823 | 0.000059  |
| H | 4.699792  | 0.621331  | 0.000187  |
| H | -4.738286 | 1.150846  | -0.000004 |
| H | -1.037255 | 0.396393  | 0.000352  |
| H | -1.345392 | 4.672164  | 0.000041  |
| H | -3.807147 | 3.580393  | 0.000069  |
| H | -4.182884 | -3.290378 | 0.000206  |
| H | -1.874003 | -4.718852 | -0.000023 |
| H | 3.115901  | -4.164036 | 0.000160  |
| H | 4.952691  | -2.202094 | -0.000054 |
| H | 3.944912  | 3.478957  | 0.000031  |
| H | 1.536520  | 4.656390  | 0.000005  |
| H | 0.483426  | -4.201523 | -0.000160 |

H 1.083626 0.397529 0.000539

**6-Azahemiporphycene BC** optimized at the B3LYP/6-311++G(d,p) level  
EE (hartrees) = -1005.82128754

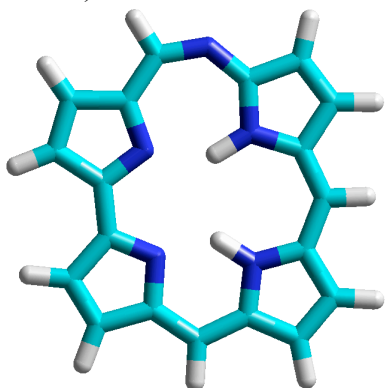

37

|   |           |           |           |
|---|-----------|-----------|-----------|
| C | 4.946743  | -2.971475 | 1.245730  |
| C | 4.647040  | -2.060925 | 0.179379  |
| N | 5.817709  | -1.837772 | -0.475879 |
| C | 6.848243  | -2.539269 | 0.092441  |
| C | 6.293168  | -3.263482 | 1.191725  |
| C | 3.400828  | -1.502546 | -0.138145 |
| C | 8.163723  | -2.465736 | -0.417855 |
| C | 8.475765  | -1.676593 | -1.523033 |
| N | 7.494489  | -0.952755 | -2.135427 |
| C | 8.035162  | -0.289189 | -3.152849 |
| C | 9.465220  | -0.579431 | -3.235153 |
| C | 9.738999  | -1.445717 | -2.217616 |
| C | 7.195092  | 0.541130  | -3.945760 |
| N | 5.879455  | 0.639766  | -3.654976 |
| C | 5.348064  | 1.490033  | -4.571116 |
| C | 6.374563  | 1.953589  | -5.487400 |
| C | 7.536138  | 1.355518  | -5.091966 |
| C | 3.998899  | 1.884022  | -4.646452 |
| N | 2.921577  | 1.591679  | -3.932537 |
| C | 2.755062  | 0.803984  | -2.875240 |
| N | 3.643419  | 0.021307  | -2.158312 |
| C | 2.971809  | -0.620992 | -1.126558 |
| C | 1.593617  | -0.208744 | -1.215958 |
| C | 1.462475  | 0.646654  | -2.265332 |
| H | 8.936521  | -3.043524 | 0.074245  |
| H | 3.788209  | 2.575710  | -5.461903 |
| H | 8.516897  | 1.457919  | -5.532822 |
| H | 6.225209  | 2.636641  | -6.311317 |
| H | 0.579464  | 1.149020  | -2.626442 |
| H | 0.825207  | -0.549573 | -0.538020 |
| H | 4.224193  | -3.347653 | 1.954264  |
| H | 6.846768  | -3.916535 | 1.849229  |
| H | 10.694680 | -1.881915 | -1.964076 |
| H | 10.158555 | -0.181737 | -3.961593 |
| H | 2.599622  | -1.820170 | 0.520592  |
| H | 6.067794  | -1.252693 | -1.301214 |

H 4.640186 0.007830 -2.456686

**6-Azahemiporphycene BD** optimized at the B3LYP/6-311++G(d,p) level  
EE (hartrees) = -1005.82774939

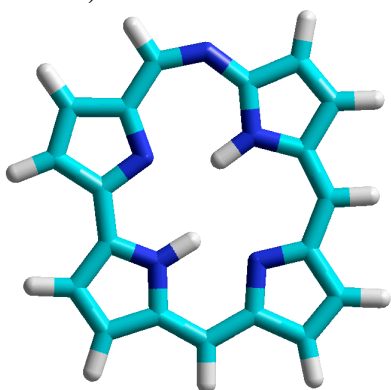

37

|   |           |           |           |
|---|-----------|-----------|-----------|
| C | 4.948567  | -2.986391 | 1.241745  |
| C | 4.656154  | -2.059803 | 0.156284  |
| N | 5.775129  | -1.789551 | -0.542495 |
| C | 6.790367  | -2.498576 | 0.036945  |
| C | 6.280977  | -3.258916 | 1.165427  |
| C | 3.387097  | -1.522961 | -0.123596 |
| C | 8.116564  | -2.461159 | -0.431475 |
| C | 8.504337  | -1.692659 | -1.531728 |
| N | 7.575761  | -0.940728 | -2.193219 |
| C | 8.111344  | -0.262420 | -3.225671 |
| C | 9.505698  | -0.589901 | -3.251765 |
| C | 9.746951  | -1.467776 | -2.211974 |
| C | 7.252119  | 0.559693  | -3.998403 |
| N | 5.941644  | 0.626629  | -3.667610 |
| C | 5.371578  | 1.474152  | -4.564448 |
| C | 6.366671  | 1.962220  | -5.500968 |
| C | 7.551580  | 1.384862  | -5.142753 |
| C | 4.016594  | 1.858978  | -4.623807 |
| N | 2.938905  | 1.569073  | -3.913175 |
| C | 2.758059  | 0.783146  | -2.856468 |
| N | 3.628781  | -0.005264 | -2.130466 |
| C | 2.947499  | -0.641772 | -1.104654 |
| C | 1.574022  | -0.220245 | -1.204716 |
| C | 1.458963  | 0.635877  | -2.256806 |
| H | 8.865635  | -3.051899 | 0.082008  |
| H | 3.804440  | 2.552193  | -5.438006 |
| H | 8.518450  | 1.509230  | -5.607756 |
| H | 6.183235  | 2.648361  | -6.315331 |
| H | 0.583240  | 1.145013  | -2.626192 |
| H | 0.796969  | -0.554243 | -0.533320 |
| H | 4.232922  | -3.369026 | 1.955427  |
| H | 6.863583  | -3.906938 | 1.804562  |
| H | 10.693644 | -1.913292 | -1.945864 |
| H | 10.224928 | -0.211449 | -3.961259 |
| H | 2.594487  | -1.848996 | 0.542609  |
| H | 6.599191  | -0.945311 | -1.877534 |
| H | 4.622669  | -0.056481 | -2.380991 |

**6-Azahemiporphycene CD** optimized at the B3LYP/6-311++G(d,p) level  
EE (hartrees) = -1005.79476173

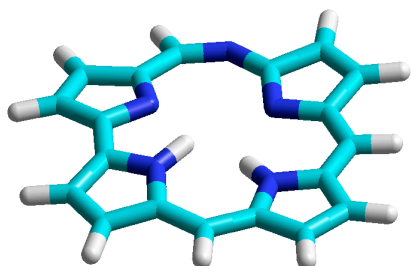

37

|   |           |           |           |
|---|-----------|-----------|-----------|
| C | 3.649915  | -2.291508 | -0.022135 |
| C | 2.938299  | -1.058041 | -0.067884 |
| N | 1.604378  | -1.365634 | -0.105759 |
| C | 1.416381  | -2.738734 | -0.074465 |
| C | 2.725329  | -3.310469 | -0.034293 |
| C | 3.426765  | 0.256176  | -0.035276 |
| C | 0.203852  | -3.435916 | -0.034502 |
| C | -1.068952 | -2.881245 | 0.073758  |
| N | -1.294378 | -1.544376 | 0.255404  |
| C | -2.612521 | -1.227968 | 0.160076  |
| C | -3.311625 | -2.454121 | -0.031900 |
| C | -2.369122 | -3.465854 | -0.077258 |
| C | -2.881168 | 0.165529  | 0.149540  |
| N | -1.781035 | 0.949645  | 0.184058  |
| C | -2.204160 | 2.209953  | -0.008233 |
| C | -3.657516 | 2.241918  | -0.130082 |
| C | -4.083144 | 0.945906  | -0.033502 |
| C | -1.379636 | 3.349632  | -0.153362 |
| N | -0.085659 | 3.578499  | -0.099070 |
| C | 1.037269  | 2.850016  | -0.010765 |
| N | 1.313129  | 1.522948  | -0.101025 |
| C | 2.681115  | 1.429752  | -0.018641 |
| C | 3.300974  | 2.748870  | 0.133679  |
| C | 2.283561  | 3.628626  | 0.147249  |
| H | 0.272075  | -4.514878 | -0.102488 |
| H | -1.954793 | 4.261024  | -0.334468 |
| H | -5.095055 | 0.573168  | -0.095025 |
| H | -4.262165 | 3.124083  | -0.286470 |
| H | 2.301551  | 4.703897  | 0.238556  |
| H | 4.362414  | 2.933226  | 0.219911  |
| H | 4.724333  | -2.380475 | 0.025443  |
| H | 2.919653  | -4.371530 | 0.009377  |
| H | -2.553978 | -4.517212 | -0.239088 |
| H | -4.379268 | -2.556403 | -0.146386 |
| H | 4.504404  | 0.359281  | 0.022538  |
| H | -0.657863 | -0.775786 | 0.425600  |

H 0.950481 -0.599283 -0.254351



**6-Azahemiporphycene AB** optimized at the M05-2X/6-311++G(d,p) level  
EE (hartrees) = -1005.68442539

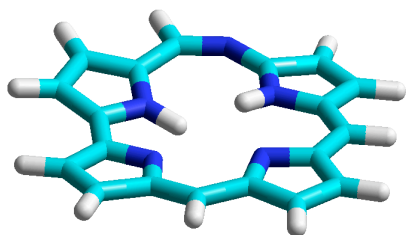

37

|   |           |           |           |
|---|-----------|-----------|-----------|
| C | 4.911870  | -3.096767 | 1.200724  |
| C | 4.513324  | -2.173777 | 0.154485  |
| N | 5.570527  | -1.818234 | -0.617413 |
| C | 6.630311  | -2.454145 | -0.104409 |
| C | 6.244765  | -3.280232 | 1.032085  |
| C | 3.242706  | -1.649924 | -0.036719 |
| C | 7.972814  | -2.342542 | -0.558942 |
| C | 8.409296  | -1.496529 | -1.549134 |
| N | 7.562492  | -0.640195 | -2.183061 |
| C | 8.239854  | -0.080215 | -3.159952 |
| C | 9.623936  | -0.533881 | -3.193127 |
| C | 9.732359  | -1.417604 | -2.167666 |
| C | 7.455298  | 0.758956  | -4.018261 |
| N | 6.156442  | 0.894445  | -3.647226 |
| C | 5.439476  | 1.529177  | -4.609473 |
| C | 6.351685  | 1.860688  | -5.633834 |
| C | 7.604940  | 1.379025  | -5.267952 |
| C | 4.038866  | 1.746227  | -4.639668 |
| N | 3.044337  | 1.412454  | -3.875505 |
| C | 2.839552  | 0.672594  | -2.771814 |
| N | 3.600833  | -0.213877 | -2.036643 |
| C | 2.838295  | -0.732647 | -1.005937 |
| C | 1.555522  | -0.140894 | -1.088043 |
| C | 1.557183  | 0.711248  | -2.159906 |
| H | 8.699282  | -2.989985 | -0.083083 |
| H | 3.741378  | 2.329777  | -5.508568 |
| H | 5.873839  | 0.544930  | -2.744696 |
| H | 8.515660  | 1.430230  | -5.838890 |
| H | 6.089028  | 2.370335  | -6.545815 |
| H | 0.763716  | 1.333187  | -2.534916 |
| H | 0.749381  | -0.345833 | -0.403668 |
| H | 4.264865  | -3.529551 | 1.946557  |
| H | 6.912010  | -3.892560 | 1.617755  |
| H | 10.603986 | -1.979180 | -1.871774 |
| H | 10.386807 | -0.227897 | -3.889658 |
| H | 2.467478  | -1.950946 | 0.656956  |
| H | 4.528036  | -0.596132 | -2.188662 |

**6-Azahemiporphycene AC** optimized at the M05-2X/6-311++G(d,p) level  
EE (hartrees) = -1005.71853131

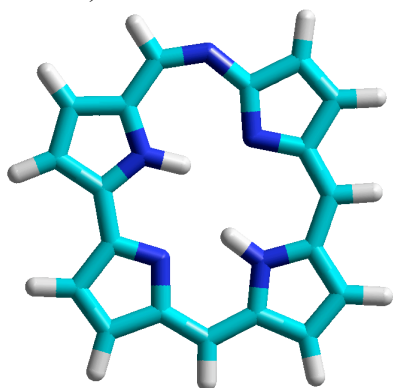

37

|   |           |           |           |
|---|-----------|-----------|-----------|
| C | 4.936195  | -2.954661 | 1.231730  |
| C | 4.614611  | -2.053475 | 0.185185  |
| N | 5.755641  | -1.807986 | -0.492239 |
| C | 6.803181  | -2.494503 | 0.048856  |
| C | 6.289238  | -3.226830 | 1.146863  |
| C | 3.354797  | -1.495408 | -0.124712 |
| C | 8.118988  | -2.422899 | -0.462743 |
| C | 8.451786  | -1.651187 | -1.553133 |
| N | 7.499958  | -0.906311 | -2.198865 |
| C | 8.097323  | -0.280002 | -3.188154 |
| C | 9.515740  | -0.596279 | -3.237881 |
| C | 9.735349  | -1.458153 | -2.209237 |
| C | 7.288412  | 0.565404  | -4.007509 |
| N | 5.968701  | 0.671907  | -3.721562 |
| C | 5.366682  | 1.512373  | -4.600327 |
| C | 6.357976  | 1.966930  | -5.496363 |
| C | 7.557103  | 1.375585  | -5.125993 |
| C | 3.994589  | 1.866647  | -4.613782 |
| N | 2.973194  | 1.546004  | -3.879701 |
| C | 2.843934  | 0.730062  | -2.799032 |
| N | 3.715474  | -0.022211 | -2.117692 |
| C | 2.969192  | -0.623350 | -1.113759 |
| C | 1.572171  | -0.206161 | -1.200802 |
| C | 1.493530  | 0.632821  | -2.245335 |
| H | 8.881083  | -3.005342 | 0.036556  |
| H | 3.757686  | 2.558830  | -5.419697 |
| H | 5.459549  | 0.207307  | -2.966650 |
| H | 5.885632  | -1.206162 | -1.300992 |
| H | 8.520064  | 1.499020  | -5.590949 |
| H | 6.186911  | 2.649556  | -6.311571 |
| H | 0.648095  | 1.161781  | -2.650483 |
| H | 0.792923  | -0.535782 | -0.532544 |
| H | 4.232690  | -3.341459 | 1.949627  |
| H | 6.868878  | -3.872313 | 1.785011  |
| H | 10.667841 | -1.916494 | -1.922774 |
| H | 10.232405 | -0.218717 | -3.948190 |

H 2.557371 -1.813665 0.535178

**6-Azahemiporphycene AD** optimized at the M05-2X/6-311++G(d,p) level  
EE (hartrees) = -1005.71039844

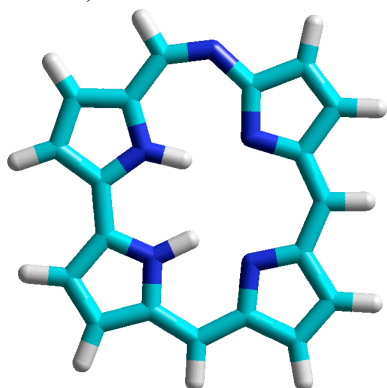

37

|   |           |           |           |
|---|-----------|-----------|-----------|
| C | 2.930947  | -3.084450 | -0.004630 |
| C | 1.630377  | -2.431069 | -0.001798 |
| N | 1.770751  | -1.114490 | -0.001416 |
| C | 3.114931  | -0.847819 | -0.003145 |
| C | 3.858291  | -2.091028 | -0.005637 |
| C | 0.387097  | -3.116713 | 0.001641  |
| C | 3.608217  | 0.451090  | -0.001151 |
| C | 2.760535  | 1.570509  | 0.001873  |
| N | 1.408085  | 1.391025  | 0.001684  |
| C | 0.762348  | 2.565086  | 0.003759  |
| C | 1.739795  | 3.590870  | 0.005876  |
| C | 2.980016  | 2.972132  | 0.004719  |
| C | -0.660924 | 2.560539  | 0.002072  |
| N | -1.345361 | 1.387541  | -0.000809 |
| C | -2.684430 | 1.638334  | -0.004356 |
| C | -2.854676 | 3.038460  | -0.003684 |
| C | -1.594572 | 3.613328  | 0.000617  |
| C | -3.727060 | 0.679744  | -0.007506 |
| N | -3.763277 | -0.619705 | -0.005081 |
| C | -2.752943 | -1.526808 | -0.000323 |
| N | -1.425696 | -1.379176 | -0.001572 |
| C | -0.910502 | -2.665198 | 0.002715  |
| C | -2.003721 | -3.640578 | 0.007627  |
| C | -3.145374 | -2.936273 | 0.005710  |
| H | 4.677645  | 0.609987  | -0.001858 |
| H | -4.709456 | 1.147934  | -0.012217 |
| H | -1.006473 | 0.410351  | -0.001208 |
| H | -1.350443 | 4.661742  | 0.002135  |
| H | -3.805712 | 3.543799  | -0.006098 |
| H | -4.169109 | -3.269322 | 0.007872  |
| H | -1.865399 | -4.709886 | 0.011878  |
| H | 3.099673  | -4.149148 | -0.005748 |
| H | 4.932184  | -2.184426 | -0.007752 |
| H | 3.943187  | 3.453625  | 0.005745  |
| H | 1.539730  | 4.648305  | 0.007994  |
| H | 0.475829  | -4.196975 | 0.004047  |

H 1.058490 0.412063 0.000227

**6-Azahemiporphycene BC** optimized at the M05-2X/6-311++G(d,p) level  
EE (hartrees) = -1005.70918643

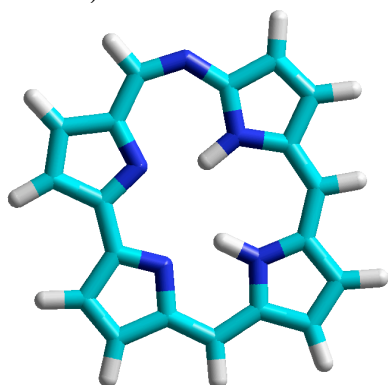

37

|   |           |           |           |
|---|-----------|-----------|-----------|
| C | 4.944957  | -2.962877 | 1.229023  |
| C | 4.648969  | -2.056089 | 0.172370  |
| N | 5.808690  | -1.827371 | -0.485244 |
| C | 6.834606  | -2.525645 | 0.076244  |
| C | 6.292297  | -3.252011 | 1.169229  |
| C | 3.400778  | -1.495866 | -0.143182 |
| C | 8.155158  | -2.454942 | -0.430368 |
| C | 8.464574  | -1.671504 | -1.523412 |
| N | 7.485320  | -0.945740 | -2.137469 |
| C | 8.026335  | -0.291234 | -3.142084 |
| C | 9.456848  | -0.578407 | -3.227570 |
| C | 9.728750  | -1.441225 | -2.215033 |
| C | 7.185498  | 0.539892  | -3.938206 |
| N | 5.882759  | 0.630472  | -3.644388 |
| C | 5.348307  | 1.476472  | -4.558044 |
| C | 6.364699  | 1.942176  | -5.473784 |
| C | 7.527434  | 1.348769  | -5.080193 |
| C | 4.006566  | 1.867948  | -4.636107 |
| N | 2.931455  | 1.578313  | -3.924254 |
| C | 2.781086  | 0.791131  | -2.867865 |
| N | 3.661193  | 0.016826  | -2.158100 |
| C | 2.987853  | -0.621372 | -1.126950 |
| C | 1.609892  | -0.206925 | -1.215697 |
| C | 1.483504  | 0.641479  | -2.260920 |
| H | 8.922333  | -3.034334 | 0.063223  |
| H | 3.799271  | 2.555386  | -5.452017 |
| H | 8.506584  | 1.450879  | -5.518581 |
| H | 6.209043  | 2.622530  | -6.295322 |
| H | 0.609456  | 1.148640  | -2.629894 |
| H | 0.845864  | -0.546799 | -0.535903 |
| H | 4.224582  | -3.340205 | 1.935289  |
| H | 6.850504  | -3.904245 | 1.819477  |
| H | 10.680267 | -1.878094 | -1.959335 |
| H | 10.145229 | -0.178709 | -3.953755 |
| H | 2.599195  | -1.810008 | 0.513020  |
| H | 6.045253  | -1.239352 | -1.305869 |
| H | 4.655457  | -0.001586 | -2.452356 |

**6-Azahemiporphycene BD** optimized at the M05-2X/6-311++G(d,p) level  
EE (hartrees) = -1005.71597528

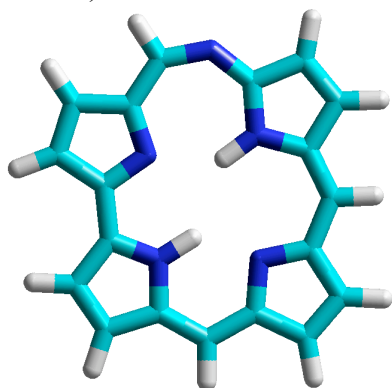

37

|   |           |           |           |
|---|-----------|-----------|-----------|
| C | 4.950167  | -2.973295 | 1.228947  |
| C | 4.658321  | -2.051378 | 0.146741  |
| N | 5.760987  | -1.775605 | -0.554880 |
| C | 6.777196  | -2.480444 | 0.019755  |
| C | 6.279900  | -3.241096 | 1.147392  |
| C | 3.383844  | -1.519280 | -0.127326 |
| C | 8.098286  | -2.449274 | -0.441184 |
| C | 8.490084  | -1.685816 | -1.538044 |
| N | 7.570342  | -0.933689 | -2.201047 |
| C | 8.111610  | -0.265274 | -3.223699 |
| C | 9.499807  | -0.593637 | -3.249839 |
| C | 9.732919  | -1.469705 | -2.210260 |
| C | 7.247599  | 0.557817  | -3.993847 |
| N | 5.951065  | 0.615551  | -3.655505 |
| C | 5.374720  | 1.460654  | -4.545479 |
| C | 6.357127  | 1.954494  | -5.483818 |
| C | 7.543754  | 1.381815  | -5.133711 |
| C | 4.028050  | 1.844556  | -4.606628 |
| N | 2.950754  | 1.555946  | -3.900009 |
| C | 2.783115  | 0.768544  | -2.847237 |
| N | 3.644091  | -0.012629 | -2.126224 |
| C | 2.959145  | -0.645831 | -1.104753 |
| C | 1.584980  | -0.224049 | -1.207957 |
| C | 1.477286  | 0.626193  | -2.254913 |
| H | 8.841077  | -3.041120 | 0.075413  |
| H | 3.820551  | 2.536315  | -5.419053 |
| H | 8.507906  | 1.506771  | -5.598243 |
| H | 6.163318  | 2.640352  | -6.292618 |
| H | 0.611769  | 1.139821  | -2.635342 |
| H | 0.810023  | -0.558935 | -0.538232 |
| H | 4.237093  | -3.354637 | 1.941786  |
| H | 6.868888  | -3.884811 | 1.780562  |
| H | 10.673196 | -1.919430 | -1.939068 |
| H | 10.217846 | -0.217447 | -3.957929 |
| H | 2.592195  | -1.844131 | 0.536616  |
| H | 6.594425  | -0.922575 | -1.903565 |

H 4.635318 -0.071075 -2.364244



**6-Azahemiporphycene CD** optimized at the M05-2X/6-311++G(d,p) level  
EE (hartrees) = -1005.68292367

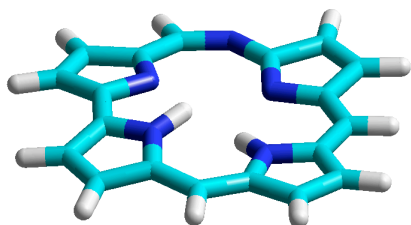

37

|   |           |           |           |
|---|-----------|-----------|-----------|
| C | 3.572993  | -2.348709 | 0.014253  |
| C | 2.875834  | -1.115996 | -0.060203 |
| N | 1.547184  | -1.398503 | -0.109379 |
| C | 1.345339  | -2.764692 | -0.060508 |
| C | 2.636305  | -3.354675 | 0.005674  |
| C | 3.396006  | 0.189732  | -0.045979 |
| C | 0.127061  | -3.447428 | -0.027249 |
| C | -1.122580 | -2.862892 | 0.077540  |
| N | -1.306609 | -1.524397 | 0.277295  |
| C | -2.600659 | -1.170398 | 0.145915  |
| C | -3.337043 | -2.365968 | -0.088939 |
| C | -2.432015 | -3.403255 | -0.122648 |
| C | -2.837436 | 0.225915  | 0.142424  |
| N | -1.727615 | 0.981955  | 0.182869  |
| C | -2.132877 | 2.245526  | 0.017826  |
| C | -3.578268 | 2.308311  | -0.102763 |
| C | -4.024910 | 1.020706  | -0.028669 |
| C | -1.302703 | 3.379109  | -0.106615 |
| N | -0.011772 | 3.592145  | -0.077991 |
| C | 1.084316  | 2.817582  | -0.017134 |
| N | 1.313308  | 1.497004  | -0.093587 |
| C | 2.678759  | 1.365424  | -0.035958 |
| C | 3.341310  | 2.668605  | 0.080044  |
| C | 2.352918  | 3.570163  | 0.099029  |
| H | 0.177011  | -4.524604 | -0.102638 |
| H | -1.872437 | 4.296731  | -0.250098 |
| H | -5.039098 | 0.662795  | -0.092761 |
| H | -4.162520 | 3.203775  | -0.241950 |
| H | 2.390460  | 4.643808  | 0.172312  |
| H | 4.407197  | 2.818864  | 0.139951  |
| H | 4.643362  | -2.446123 | 0.077846  |
| H | 2.812042  | -4.415558 | 0.069453  |
| H | -2.641438 | -4.442350 | -0.315435 |
| H | -4.400379 | -2.423423 | -0.244016 |
| H | 4.473572  | 0.269396  | 0.001911  |
| H | -0.649381 | -0.797057 | 0.518094  |

H 0.905007 -0.635573 -0.300119

**6-aza-5,11,16-triphenylhemiporphycene AC** optimized at the M05-2X/6-31G(d) level  
EE (hartrees) = -1698.59224561 at the same level  
-1698.9885953 at the M05-2X/6-311++G(d,p) level

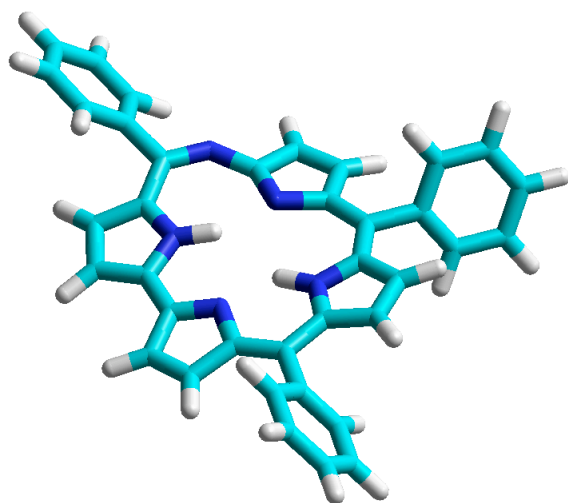

67

|   |           |           |           |
|---|-----------|-----------|-----------|
| C | 4.876166  | -3.185084 | 1.064181  |
| C | 4.576542  | -2.145456 | 0.177070  |
| C | 5.600873  | -1.609261 | -0.611745 |
| C | 6.895278  | -2.107057 | -0.517811 |
| C | 7.184793  | -3.141483 | 0.368318  |
| C | 6.172939  | -3.678377 | 1.159174  |
| C | 3.190504  | -1.632881 | 0.069519  |
| C | 2.141423  | -2.506138 | -0.165770 |
| N | 0.844280  | -2.058105 | -0.194994 |
| C | 0.086547  | -3.097207 | -0.474414 |
| C | 0.871929  | -4.305105 | -0.652351 |
| C | 2.166866  | -3.932404 | -0.459602 |
| C | -1.328414 | -2.889724 | -0.534843 |
| N | -1.816621 | -1.652528 | -0.269775 |
| C | -3.176137 | -1.666135 | -0.308743 |
| C | -3.571168 | -2.978268 | -0.645416 |
| C | -2.416089 | -3.739623 | -0.787577 |
| C | -3.982096 | -0.500422 | -0.082274 |
| C | -5.431050 | -0.736056 | 0.192289  |
| C | -6.378621 | 0.131514  | -0.359176 |
| C | -7.730765 | -0.050228 | -0.103213 |
| C | -8.152712 | -1.087388 | 0.726758  |
| C | -7.214424 | -1.939693 | 1.299606  |
| C | -5.859550 | -1.768976 | 1.031286  |
| H | -9.207048 | -1.224504 | 0.931336  |
| H | 8.193946  | -3.526124 | 0.442682  |
| N | -3.641307 | 0.752479  | -0.130401 |
| C | -2.497306 | 1.465834  | -0.279917 |
| N | -1.209958 | 1.174963  | -0.059366 |
| C | -0.537496 | 2.389587  | -0.188658 |
| C | -1.477208 | 3.450530  | -0.563379 |

|   |           |           |           |
|---|-----------|-----------|-----------|
| C | -2.689375 | 2.875644  | -0.620495 |
| C | 0.805855  | 2.660228  | 0.005828  |
| C | 1.239263  | 4.089274  | 0.021079  |
| C | 2.152537  | 4.567315  | -0.923756 |
| C | 2.559494  | 5.896792  | -0.900660 |
| C | 2.067464  | 6.761354  | 0.074000  |
| C | 1.164060  | 6.291960  | 1.023000  |
| C | 0.751036  | 4.963749  | 0.996108  |
| H | 2.387752  | 7.795415  | 0.093989  |
| C | 1.869056  | 1.722894  | 0.196140  |
| N | 1.769050  | 0.386245  | 0.006055  |
| C | 2.974037  | -0.227672 | 0.209620  |
| C | 3.892699  | 0.786006  | 0.569162  |
| C | 3.213097  | 1.991555  | 0.557337  |
| H | -1.257486 | -0.825956 | -0.049926 |
| H | 0.926210  | -0.142438 | -0.199477 |
| H | -2.348367 | -4.784621 | -1.043185 |
| H | -4.587834 | -3.302427 | -0.790343 |
| H | -3.650602 | 3.307610  | -0.847221 |
| H | -1.209999 | 4.474763  | -0.762613 |
| H | 3.607044  | 2.965540  | 0.792956  |
| H | 4.927077  | 0.622950  | 0.822114  |
| H | 3.049214  | -4.548213 | -0.531288 |
| H | 0.492657  | -5.285487 | -0.894543 |
| H | -6.033129 | 0.941209  | -0.987315 |
| H | -8.457403 | 0.617942  | -0.548017 |
| H | -7.534206 | -2.733941 | 1.962142  |
| H | -5.128899 | -2.419696 | 1.493841  |
| H | 2.532597  | 3.891557  | -1.680002 |
| H | 3.258298  | 6.258081  | -1.644518 |
| H | 0.782641  | 6.957806  | 1.786654  |
| H | 0.050521  | 4.590539  | 1.732803  |
| H | 5.369314  | -0.814973 | -1.310164 |
| H | 7.676733  | -1.690717 | -1.140674 |
| H | 6.393513  | -4.476965 | 1.856049  |
| H | 4.089095  | -3.586313 | 1.690045  |

**6-aza-5,11,16-triphenylhemiporphycene BD** optimized at the M05-2X/6-31G(d) level

EE (hartrees) = -1698.5879212 at the same level

-1698.9840477 at the M05-2X/6-311++G(d,p) level

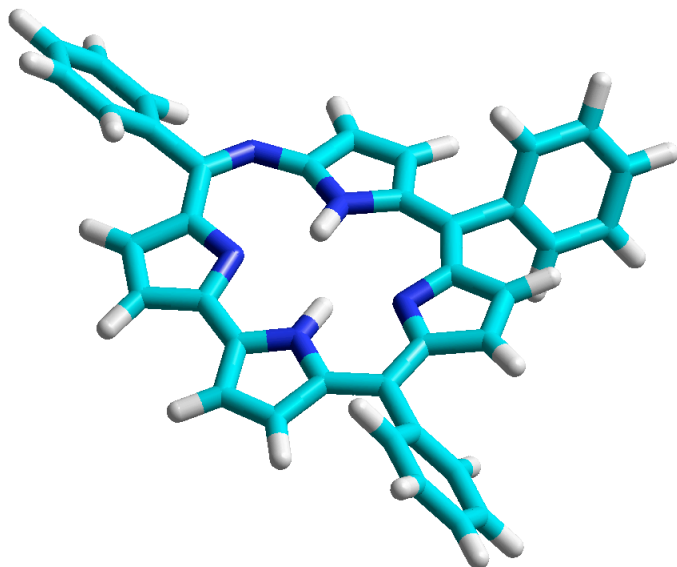

67

|   |           |           |           |
|---|-----------|-----------|-----------|
| C | 3.276977  | 1.950178  | 0.468886  |
| C | 1.892622  | 1.645533  | 0.155335  |
| N | 1.719792  | 0.327351  | -0.012612 |
| C | 2.948266  | -0.249682 | 0.152177  |
| C | 3.935972  | 0.760615  | 0.467431  |
| C | 0.863358  | 2.621174  | 0.018732  |
| C | 1.317368  | 4.045116  | 0.050263  |
| C | 2.166712  | 4.536842  | -0.945004 |
| C | 2.599583  | 5.858145  | -0.912045 |
| C | 2.194405  | 6.700843  | 0.120021  |
| C | 1.353784  | 6.217221  | 1.118442  |
| C | 0.916287  | 4.896932  | 1.083068  |
| C | 3.188962  | -1.638837 | 0.051484  |
| C | 2.138025  | -2.551130 | -0.118408 |
| N | 0.843650  | -2.124412 | -0.132026 |
| C | -0.012603 | -3.131022 | -0.342579 |
| C | 0.762023  | -4.320624 | -0.470592 |
| C | 2.088469  | -3.963318 | -0.337103 |
| C | -1.400516 | -2.830408 | -0.388502 |
| N | -1.800473 | -1.563062 | -0.190263 |
| C | -3.156613 | -1.597541 | -0.241941 |
| C | -3.620784 | -2.942052 | -0.513504 |
| C | -2.503213 | -3.720117 | -0.607211 |
| C | -3.991185 | -0.461298 | -0.105604 |
| N | -3.691237 | 0.824625  | -0.198228 |
| C | -2.581575 | 1.539246  | -0.274579 |
| N | -1.255285 | 1.251465  | -0.091530 |
| C | -0.499931 | 2.415875  | -0.153490 |
| C | -1.432186 | 3.484266  | -0.437367 |
| C | -2.676970 | 2.958387  | -0.509331 |

|   |           |           |           |
|---|-----------|-----------|-----------|
| C | 4.572628  | -2.163123 | 0.121761  |
| C | 4.900107  | -3.182917 | 1.022428  |
| C | 6.195504  | -3.685407 | 1.077652  |
| C | 7.178687  | -3.178756 | 0.232270  |
| C | 6.861306  | -2.165525 | -0.668427 |
| C | 5.567869  | -1.659231 | -0.723614 |
| C | -5.448061 | -0.693217 | 0.120854  |
| C | -6.386477 | 0.114417  | -0.529706 |
| C | -7.745170 | -0.071021 | -0.313773 |
| C | -8.185808 | -1.049309 | 0.575979  |
| C | -7.258886 | -1.838021 | 1.249375  |
| C | -5.897024 | -1.662781 | 1.023240  |
| H | -9.245499 | -1.188075 | 0.749769  |
| H | 8.186662  | -3.571150 | 0.275368  |
| H | 2.533987  | 7.728496  | 0.146857  |
| H | -2.442451 | -4.777060 | -0.815226 |
| H | -4.646120 | -3.241142 | -0.654822 |
| H | -3.617204 | 3.451168  | -0.691675 |
| H | -1.142249 | 4.512114  | -0.572184 |
| H | 3.677485  | 2.927166  | 0.683733  |
| H | 4.975842  | 0.581459  | 0.687723  |
| H | 2.946954  | -4.611872 | -0.399436 |
| H | 0.366291  | -5.307959 | -0.644277 |
| H | -6.030077 | 0.881421  | -1.203655 |
| H | -8.462607 | 0.549105  | -0.836306 |
| H | -7.593230 | -2.584153 | 1.959132  |
| H | -5.175255 | -2.259792 | 1.565414  |
| H | 2.479774  | 3.876504  | -1.744287 |
| H | 3.250927  | 6.229777  | -1.692885 |
| H | 1.040325  | 6.865596  | 1.926749  |
| H | 0.265208  | 4.513582  | 1.859168  |
| H | 5.312403  | -0.882984 | -1.433822 |
| H | 7.619771  | -1.772844 | -1.333647 |
| H | 6.438126  | -4.467046 | 1.786386  |
| H | 4.138039  | -3.560223 | 1.692762  |
| H | -0.941014 | 0.292858  | 0.038260  |
| H | 0.617329  | -1.133439 | -0.076198 |

**5-Azahemiporphycene** optimized at the B3LYP/6-311++G(d,p) level  
EE (hartrees) = -1005.8279741

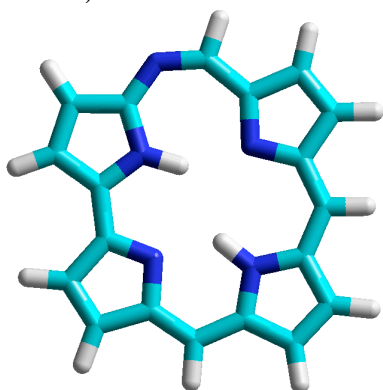

37

|   |           |           |           |
|---|-----------|-----------|-----------|
| C | 4.927040  | -2.952142 | 1.225420  |
| C | 4.596131  | -2.025319 | 0.152813  |
| N | 5.696632  | -1.722201 | -0.583752 |
| C | 6.731104  | -2.429326 | -0.014687 |
| C | 6.254123  | -3.202399 | 1.120500  |
| C | 3.234811  | -1.596016 | 0.041372  |
| N | 2.534802  | -0.803622 | -0.742696 |
| C | 2.952888  | -0.087354 | -1.786743 |
| N | 4.216859  | 0.003359  | -2.305365 |
| C | 4.225349  | 0.849236  | -3.383503 |
| C | 2.896787  | 1.324852  | -3.564266 |
| C | 2.114264  | 0.751335  | -2.585268 |
| C | 5.431530  | 1.090682  | -4.075346 |
| N | 6.536079  | 0.475261  | -3.645326 |
| C | 7.562998  | 0.855943  | -4.457105 |
| C | 7.059861  | 1.779122  | -5.470708 |
| C | 5.726151  | 1.927290  | -5.232804 |
| C | 8.852997  | 0.370690  | -4.251689 |
| C | 9.163447  | -0.525779 | -3.210875 |
| N | 8.224816  | -0.984504 | -2.328219 |
| C | 8.772534  | -1.837405 | -1.418492 |
| C | 10.166886 | -1.932465 | -1.742434 |
| C | 10.404978 | -1.131864 | -2.836355 |
| C | 8.079901  | -2.474839 | -0.387084 |
| H | 9.656043  | 0.684700  | -4.907235 |
| H | 5.021433  | -0.505504 | -1.915153 |
| H | 7.252765  | -0.673382 | -2.413758 |
| H | 2.584222  | 2.010671  | -4.336472 |
| H | 1.057703  | 0.879843  | -2.411415 |
| H | 4.226522  | -3.344735 | 1.947990  |
| H | 6.866823  | -3.842586 | 1.739108  |
| H | 10.882714 | -2.535336 | -1.204268 |
| H | 11.347004 | -0.972961 | -3.338942 |
| H | 7.644355  | 2.245764  | -6.250828 |
| H | 5.022659  | 2.535715  | -5.781689 |
| H | 8.696250  | -3.117353 | 0.233239  |
| H | 2.618917  | -2.051140 | 0.816547  |

**5-Azahemiporphycene** optimized at the M05-2X/6-311++G(d,p) level  
EE (hartrees) = -1005.7164416

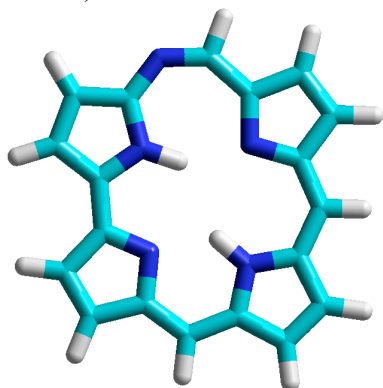

37

|   |           |           |           |
|---|-----------|-----------|-----------|
| C | 4.927040  | -2.952142 | 1.225420  |
| C | 4.596131  | -2.025319 | 0.152813  |
| N | 5.696632  | -1.722201 | -0.583752 |
| C | 6.731104  | -2.429326 | -0.014687 |
| C | 6.254123  | -3.202399 | 1.120500  |
| C | 3.234811  | -1.596016 | 0.041372  |
| N | 2.534802  | -0.803622 | -0.742696 |
| C | 2.952888  | -0.087354 | -1.786743 |
| N | 4.216859  | 0.003359  | -2.305365 |
| C | 4.225349  | 0.849236  | -3.383503 |
| C | 2.896787  | 1.324852  | -3.564266 |
| C | 2.114264  | 0.751335  | -2.585268 |
| C | 5.431530  | 1.090682  | -4.075346 |
| N | 6.536079  | 0.475261  | -3.645326 |
| C | 7.562998  | 0.855943  | -4.457105 |
| C | 7.059861  | 1.779122  | -5.470708 |
| C | 5.726151  | 1.927290  | -5.232804 |
| C | 8.852997  | 0.370690  | -4.251689 |
| C | 9.163447  | -0.525779 | -3.210875 |
| N | 8.224816  | -0.984504 | -2.328219 |
| C | 8.772534  | -1.837405 | -1.418492 |
| C | 10.166886 | -1.932465 | -1.742434 |
| C | 10.404978 | -1.131864 | -2.836355 |
| C | 8.079901  | -2.474839 | -0.387084 |
| H | 9.656043  | 0.684700  | -4.907235 |
| H | 5.021433  | -0.505504 | -1.915153 |
| H | 7.252765  | -0.673382 | -2.413758 |
| H | 2.584222  | 2.010671  | -4.336472 |
| H | 1.057703  | 0.879843  | -2.411415 |
| H | 4.226522  | -3.344735 | 1.947990  |
| H | 6.866823  | -3.842586 | 1.739108  |
| H | 10.882714 | -2.535336 | -1.204268 |
| H | 11.347004 | -0.972961 | -3.338942 |
| H | 7.644355  | 2.245764  | -6.250828 |
| H | 5.022659  | 2.535715  | -5.781689 |
| H | 8.696250  | -3.117353 | 0.233239  |



H 2.618917 -2.051140 0.816547

**5-aza-6,11,16-triphenylhemiporphycene** optimized at the M05-2X/6-31G(d) level  
 EE (hartrees) = -1698.5849916 at the same level  
 -1698.9811507 at the M05-2X/6-311++G(d,p) level

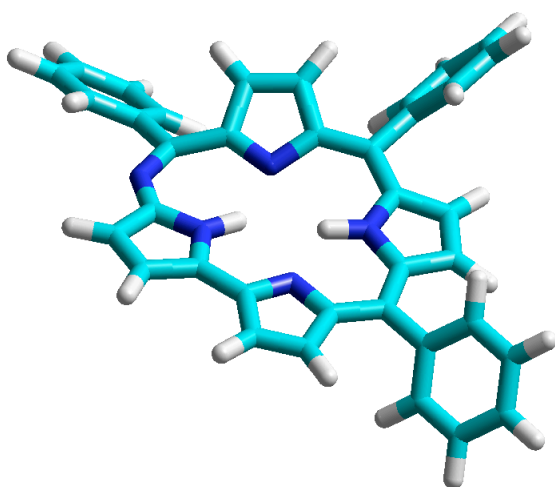

|    |           |           |           |
|----|-----------|-----------|-----------|
| 67 |           |           |           |
| N  | 3.314889  | -2.580183 | -0.175452 |
| C  | 2.134220  | -3.181308 | -0.388239 |
| C  | 1.975574  | -4.562133 | -0.663503 |
| C  | 0.617286  | -4.822457 | -0.735296 |
| C  | -0.052416 | -3.606897 | -0.489876 |
| C  | -1.418441 | -3.247172 | -0.376108 |
| C  | -2.629148 | -4.054295 | -0.470270 |
| C  | -3.660596 | -3.196494 | -0.263944 |
| C  | -3.062323 | -1.878392 | -0.048110 |
| C  | -3.675923 | -0.653955 | 0.156903  |
| C  | -2.905162 | 0.551300  | 0.214969  |
| C  | -3.329735 | 1.873004  | 0.510247  |
| C  | -2.225811 | 2.695827  | 0.420557  |
| C  | -1.107129 | 1.886703  | 0.076595  |
| C  | 0.226683  | 2.301302  | -0.161827 |
| C  | 1.367787  | 1.512747  | -0.334646 |
| C  | 2.625479  | 2.092492  | -0.768718 |
| C  | 3.540984  | 1.099245  | -0.722090 |
| C  | 2.834418  | -0.087129 | -0.264797 |
| C  | 3.611189  | -1.318147 | -0.057082 |
| N  | 0.891645  | -2.639648 | -0.301316 |
| N  | -1.701772 | -1.980410 | -0.131726 |
| N  | -1.565814 | 0.610788  | -0.022676 |
| N  | 1.529789  | 0.156917  | -0.081799 |
| C  | -5.146646 | -0.564468 | 0.310696  |
| C  | -5.806526 | -1.358255 | 1.255302  |
| C  | -7.188740 | -1.289799 | 1.393185  |
| C  | -7.929388 | -0.426286 | 0.591285  |
| C  | -7.281517 | 0.368379  | -0.350971 |
| C  | -5.900266 | 0.301297  | -0.490780 |
| C  | 0.405621  | 3.781927  | -0.228047 |

|   |           |           |           |
|---|-----------|-----------|-----------|
| C | 1.245817  | 4.433256  | 0.679979  |
| C | 1.402242  | 5.814173  | 0.629431  |
| C | 0.726889  | 6.558933  | -0.333629 |
| C | -0.109408 | 5.917935  | -1.243701 |
| C | -0.274901 | 4.538203  | -1.187420 |
| H | 0.711948  | -1.660461 | -0.079777 |
| H | -1.027190 | -0.234050 | -0.199713 |
| H | 2.797567  | -5.248013 | -0.782657 |
| H | 0.137274  | -5.768355 | -0.928055 |
| H | -2.676098 | -5.113415 | -0.669775 |
| H | -4.716361 | -3.415888 | -0.277237 |
| H | -5.223782 | -2.012151 | 1.892089  |
| H | -7.685192 | -1.904343 | 2.133385  |
| H | -9.005119 | -0.371931 | 0.700279  |
| H | -7.853182 | 1.035794  | -0.983372 |
| H | -5.397172 | 0.904118  | -1.236396 |
| H | -4.335588 | 2.155515  | 0.772726  |
| H | -2.189017 | 3.757340  | 0.597817  |
| H | 1.767300  | 3.848166  | 1.426915  |
| H | 2.049577  | 6.307668  | 1.343128  |
| H | 0.852235  | 7.633469  | -0.375253 |
| H | -0.631552 | 6.490993  | -1.999330 |
| H | -0.922775 | 4.035295  | -1.894584 |
| H | 2.768944  | 3.110153  | -1.091052 |
| H | 4.582353  | 1.142571  | -0.993616 |
| C | 5.050876  | -1.098344 | 0.294385  |
| C | 5.429705  | -0.123661 | 1.222570  |
| C | 6.765219  | 0.027484  | 1.582491  |
| C | 7.738299  | -0.787915 | 1.013552  |
| C | 7.367673  | -1.766440 | 0.093276  |
| C | 6.033169  | -1.927842 | -0.254980 |
| H | 4.672789  | 0.506933  | 1.671916  |
| H | 7.043025  | 0.778980  | 2.310866  |
| H | 8.778382  | -0.666310 | 1.288890  |
| H | 8.120411  | -2.405266 | -0.351475 |
| H | 5.729719  | -2.695972 | -0.953283 |
